# Supplementary material for: Effect of baseline cancer pain on the efficacy of immunotherapy in lung cancer patients
Source: PubMed Central journal article supplement — J Thorac Dis. 2023 Jul 25;15(8):4314–23. doi: 10.21037/jtd-23-375 (PMC10482640; doi:10.21037/jtd-23-375), 2023-07-25
Supplement: jtd-15-08-4314-supplementary.pdf [file jtd-15-08-4314-supplementary.pdf]

**Table S1** Characteristics of cancer pain after PSM

| Cancer pain characteristics | Proportion (%) | Number |
|-----------------------------|----------------|--------|
| Pain property               |                |        |
| Somatic pain                | 37.5           | 18     |
| Neuropathic pain            | 31.3           | 15     |
| Visceral pain               | 8.3            | 4      |
| Mixed pain                  | 22.9           | 11     |
| Pain sites                  |                |        |
| ≤2                          | 93.8           | 45     |
| ≥3                          | 6.3            | 3      |
| Breakthrough pain           |                |        |
| Yes                         | 39.6           | 19     |
| No                          | 60.4           | 29     |

PSM, propensity score matching.

**Table S2** Effect of Immunotherapy (after PSM)

| Response | Group                  |                        |
|----------|------------------------|------------------------|
|          | Cancer pain (+) (n=48) | Cancer pain (-) (n=48) |
| CR       | 0                      | 1                      |
| PR       | 7                      | 15                     |
| SD       | 24                     | 24                     |
| PD       | 14                     | 8                      |
| NE       | 3                      | 0                      |
| ORR (%)  | 14.58                  | 33.33                  |

PSM, propensity score matching; CR, complete response; PR, partial response; SD, stable disease; PD, progressive disease; NE, not evaluable; ORR, overall response rate.
